# Supplementary material for: Evaluation of the effects of irrigation and fertilization on tomato fruit yield and quality: a principal component analysis
Source: PubMed Central journal article supplement (PMC5428234; doi:10.1038/s41598-017-00373-8), 2017-03-23
Supplement: 41598_2017_373_MOESM1_ESM.pdf [file 41598_2017_373_MOESM1_ESM.pdf]

## Supplementary Information (SI)

### **Evaluation of the effects of irrigation and fertilization on tomato fruit yield and quality: a principal component analysis**

Xiukang Wang<sup>1, 2\*</sup> and Yingying Xing<sup>1\*</sup>

1 College of Life Science, Yan'an University, Yan'an, Shaanxi 716000, China

2 State Key Laboratory of Soil Erosion and Dryland Farming on the Loess Plateau, Institute of Soil and Water Conservation, Chinese Academy of Sciences and Ministry of Water Resources, Yangling, Shaanxi 712100, China

\* These authors made equal contribution, with Xiukang Wang conducted the principal component analysis and Yingying Xing conducted WUE, PFP, fruit quality and yield of tomatoes analysis but both contributed to the manuscript drafting.

Corresponding author: [wangxiukang@126.com](mailto:wangxiukang@126.com)

**Address:** 580 Shengdi Road, Yan'an, Shaanxi 716000, China

**Tel/Fax:** +86 911 2332030

**Email:** [wangxiukang@126.com](mailto:wangxiukang@126.com)

Supplementary material and methods

Supplement Tables: 15

Supplement Figure: 9

Supplementary Table S1. Analysis of variance summary for yields, water use efficiency (WUE) and partial factor productivity (PFP) as affected by irrigation (I) and fertilization treatment (F).

| Item  | Source            | DF | MS       | F value  | Sign‡ |
|-------|-------------------|----|----------|----------|-------|
| Yield | Intercept         | 1  | 5.39E+11 | 2.57E+04 | ***   |
|       | Irrigation (I)    | 2  | 1.12E+09 | 688.81   | ***   |
|       | Fertilization (F) | 2  | 9.14E+08 | 1.46E+03 | ***   |
|       | Replication (R)   | 8  | 2.10E+07 | 12.35    | ***   |
|       | I × F             | 4  | 7.68E+07 | 140.48   | ***   |
|       | I × R             | 16 | 1.62E+06 | 2.97     | **    |
|       | F × R             | 16 | 6.25E+05 | 1.14     | NS    |
|       | I × F × R         | 32 | 5.46E+05 | –        | –     |
| WUE   | Intercept         | 1  | 1.11E+05 | 1.58E+04 | ***   |
|       | Irrigation (I)    | 2  | 1.11E+03 | 664.22   | ***   |
|       | Fertilization (F) | 2  | 168.35   | 1.39E+03 | ***   |
|       | Replication (R)   | 8  | 6.99     | 4.30     | **    |
|       | I × F             | 4  | 8.13     | 51.04    | ***   |
|       | I × R             | 16 | 1.67     | 10.45    | ***   |
|       | F × R             | 16 | 0.12     | 0.76     | NS    |
|       | I × F × R         | 32 | 0.16     | –        | –     |
| PFP   | Intercept         | 1  | 4.18E+06 | 2.37E+04 | ***   |
|       | Irrigation (I)    | 2  | 7.23E+03 | 646.28   | ***   |
|       | Fertilization (F) | 2  | 1.08E+05 | 6.80E+03 | ***   |
|       | Replication (R)   | 8  | 176.31   | 7.56     | ***   |
|       | I × F             | 4  | 128.24   | 34.49    | ***   |
|       | I × R             | 16 | 11.19    | 3.01     | **    |
|       | F × R             | 16 | 15.84    | 4.26     | ***   |
|       | I × F × R         | 32 | 3.72     | –        | –     |

‡“\*\*\*\*” means  $p < 0.001$ , “\*\*\*” means  $0.001 < p < 0.01$ , “\*\*” means  $0.01 < p < 0.05$  and

“NS” means  $p > 0.05$ .

Supplementary Table S2. Effects of irrigation amount and fertilization levels on mean yields, water use efficiency (WUE) and partial factor productivity (PFP) in three consecutive growing seasons.

| Treatment | Yield ( $10^3$ kg ha <sup>-1</sup> ) | WUE (kg m <sup>-3</sup> ) | PFP (kg kg <sup>-1</sup> ) |
|-----------|--------------------------------------|---------------------------|----------------------------|
| W1F1      | 95.8±1.56 a‡                         | 34.5±0.61 de              | 187.9±3.06 f               |
| W1F2      | 89.9±1.32 b                          | 32.2±0.47 f               | 235.1±3.45 c               |
| W1F3      | 78.0±1.43 e                          | 27.6±0.49 g               | 305.8±5.61 a               |
| W2F1      | 85.7±1.65 c                          | 37.0±1.02 c               | 168.0±3.24 g               |
| W2F2      | 83.0±2.06 d                          | 36.1±1.11 cd              | 217.0±5.40 d               |
| W2F3      | 76.2±1.71 e                          | 33.2±0.63 ef              | 299.0±6.71 a               |
| W3F1      | 78.0±1.91 e                          | 45.3±1.86 a               | 153.0±3.74 h               |
| W3F2      | 75.9±1.78 e                          | 44.9±1.43 a               | 198.5±4.67 e               |
| W3F3      | 71.2±2.17 f                          | 41.7±1.49 b               | 279.2±8.49 b               |

W1: 100%  $ET_0$ , W2: 75%  $ET_0$ , W3: 50%  $ET_0$ , and F1: 240N–120P<sub>2</sub>O<sub>5</sub>–150K<sub>2</sub>O kg ha<sup>-1</sup>, F2: 180N–90P<sub>2</sub>O<sub>5</sub>–112.5K<sub>2</sub>O kg ha<sup>-1</sup>, F3: 120N–60P<sub>2</sub>O<sub>5</sub>–75K<sub>2</sub>O kg ha<sup>-1</sup>.

‡Values followed by a different lowercase letter between management treatments are significantly different  $p < 0.05$  according to Tukey's HSD mean separation test.

Supplementary Table S3. Analysis of variance summary for total soluble solids (TSS), organic acid (OA) and Lycopene as affected by irrigation (I) and fertilization (F) treatment.

| Item     | Source            | DF | MS       | F value  | Sign‡ |
|----------|-------------------|----|----------|----------|-------|
| TSS      | Intercept         | 1  | 1.93E+03 | 4.17E+04 | ***   |
|          | Irrigation (I)    | 2  | 0.069    | 5.269    | *     |
|          | Fertilization (F) | 2  | 0.276    | 17.813   | ***   |
|          | Replication (R)   | 8  | 0.046    | 3.523    | NS    |
|          | I × F             | 4  | 0.017    | 1.116    | NS    |
|          | I × R             | 16 | 0.013    | 0.846    | NS    |
|          | F × R             | 16 | 0.015    | 1.006    | NS    |
|          | I × F × R         | 32 | 0.015    | –        | –     |
| OA       | Intercept         | 1  | 6.483    | 3.82E+03 | ***   |
|          | Irrigation (I)    | 2  | 0.006    | 12.137   | **    |
|          | Fertilization (F) | 2  | 0.031    | 46.899   | ***   |
|          | Replication (R)   | 8  | 0.002    | 1.829    | NS    |
|          | I × F             | 4  | 0.001    | 3.157    | *     |
|          | I × R             | 16 | 0.000    | 2.292    | *     |
|          | F × R             | 16 | 0.001    | 3.038    | **    |
|          | I × F × R         | 32 | 0.000    | –        | –     |
| Lycopene | Intercept         | 1  | 1.08E+05 | 2.34E+03 | ***   |
|          | Irrigation (I)    | 2  | 2.24E+03 | 115.180  | ***   |
|          | Fertilization (F) | 2  | 1.96E+03 | 134.877  | ***   |
|          | Replication (R)   | 8  | 45.934   | 1.823    | NS    |
|          | I × F             | 4  | 29.847   | 3.387    | *     |
|          | I × R             | 16 | 19.486   | 2.211    | *     |
|          | F × R             | 16 | 14.518   | 1.647    | NS    |
|          | I × F × R         | 32 | 8.813    | –        | –     |

‡“\*\*\*\*” means  $p < 0.001$ , “\*\*\*” means  $0.001 < p < 0.01$ , “\*\*” means  $0.01 < p < 0.05$  and

“NS” means  $p > 0.05$ .

Supplementary Table S4. Analysis of variance summary for soluble sugar content (SSC) and vitamin C content (VC) as affected by irrigation (I) and fertilization (F) treatment.

| Item | Source            | DF | MS       | F value  | Sign‡ |
|------|-------------------|----|----------|----------|-------|
| SSC  | Intercept         | 1  | 694.666  | 2.84E+04 | ***   |
|      | Irrigation (I)    | 2  | 0.822    | 36.429   | ***   |
|      | Fertilization (F) | 2  | 2.897    | 140.344  | ***   |
|      | Replication (R)   | 8  | 0.024    | 1.152    | NS    |
|      | I × F             | 4  | 0.023    | 1.028    | NS    |
|      | I × R             | 16 | 0.023    | 1.028    | NS    |
|      | F × R             | 16 | 0.021    | 0.940    | NS    |
|      | I × F × R         | 32 | 0.022    | –        | –     |
| VC   | Intercept         | 1  | 6.84E+04 | 2.30E+03 | ***   |
|      | Irrigation (I)    | 2  | 1.27E+03 | 194.969  | ***   |
|      | Fertilization (F) | 2  | 222.626  | 76.320   | **    |
|      | Replication (R)   | 8  | 29.744   | 4.336    | *     |
|      | I × F             | 4  | 9.151    | 3.553    | *     |
|      | I × R             | 16 | 6.518    | 2.530    | *     |
|      | F × R             | 16 | 2.917    | 1.132    | NS    |
|      | I × F × R         | 32 | 2.576    | –        | –     |

‡“\*\*\*” means  $p < 0.001$ , “\*\*” means  $0.001 < p < 0.01$ , “\*” means  $0.01 < p < 0.05$  and

“NS” means  $p > 0.05$ .

Supplementary Table S5. Analysis of variance summary for nitrate concentration (NC) and sugar/acid content ratio (SAR) as affected by irrigation (I) and fertilization (F) treatment.

| Item | Source            | DF | MS       | F value  | Sign‡ |
|------|-------------------|----|----------|----------|-------|
| NC   | Intercept         | 1  | 2.01E+05 | 1.03E+04 | ***   |
|      | Irrigation (I)    | 2  | 752.897  | 90.902   | ***   |
|      | Fertilization (F) | 2  | 1.76E+03 | 156.619  | ***   |
|      | Replication (R)   | 8  | 19.515   | 1.699    | NS    |
|      | I × F             | 4  | 24.552   | 3.063    | *     |
|      | I × R             | 16 | 8.283    | 1.033    | NS    |
|      | F × R             | 16 | 11.218   | 1.400    | NS    |
|      | I × F × R         | 32 | 8.015    | –        | –     |
| SAR  | Intercept         | 1  | 9.02E+03 | 9.45E+03 | ***   |
|      | Irrigation (I)    | 2  | 0.030    | 0.033    | NS    |
|      | Fertilization (F) | 2  | 0.975    | 0.611    | NS    |
|      | Replication (R)   | 8  | 0.954    | 0.509    | NS    |
|      | I × F             | 4  | 1.199    | 1.859    | NS    |
|      | I × R             | 16 | 0.923    | 1.431    | NS    |
|      | F × R             | 16 | 1.596    | 2.476    | *     |
|      | I × F × R         | 32 | 0.645    | –        | –     |

‡“\*\*\*” means  $p < 0.001$ , “\*\*” means  $0.001 < p < 0.01$ , “\*” means  $0.01 < p < 0.05$  and

“NS” means  $p > 0.05$ .

Supplementary Table S6. Mean vitamin C, soluble sugar content, total soluble solids, nitrate, lycopene, organic acid and sugar–acid ratio results from the different irrigation and fertilization levels on tomato fruit quality.

| Treatment | TSS (%) | OA (%) | Lycopene (mg kg <sup>-1</sup> ) | SSC (%) | VC (mg 100g <sup>-1</sup> ) | NC (mg kg <sup>-1</sup> ) | SAR   |
|-----------|---------|--------|---------------------------------|---------|-----------------------------|---------------------------|-------|
| W1F1      | 4.94    | 0.29   | 33.41                           | 3.03    | 25.07                       | 51.73                     | 10.74 |
| W1F2      | 4.86    | 0.27   | 27.20                           | 2.76    | 22.47                       | 47.43                     | 10.40 |
| W1F3      | 4.67    | 0.23   | 20.43                           | 2.43    | 20.16                       | 37.94                     | 10.49 |
| W2F1      | 5.01    | 0.31   | 45.68                           | 3.30    | 30.45                       | 56.11                     | 11.09 |
| W2F2      | 4.87    | 0.30   | 38.44                           | 3.01    | 28.48                       | 47.15                     | 10.19 |
| W2F3      | 4.81    | 0.25   | 27.14                           | 2.55    | 26.16                       | 40.27                     | 10.29 |
| W3F1      | 5.01    | 0.34   | 54.28                           | 3.40    | 40.31                       | 64.35                     | 10.35 |
| W3F2      | 4.92    | 0.30   | 46.43                           | 3.08    | 36.11                       | 57.08                     | 10.46 |
| W3F3      | 4.84    | 0.26   | 34.93                           | 2.79    | 32.28                       | 45.75                     | 10.96 |

Notes: TSS: total soluble solids, OA: organic acid, SSC: soluble sugar content, VC: vitamin C content, NC: nitrate concentration, SAR: sugar/acid content ratio.

Supplementary Table S7. The standardized values of tomato fruit quality.

| Treatment | TSS (%) | OA (%) | Lycopene (mg kg <sup>-1</sup> ) | SSC (%) | Vc (mg 100g <sup>-1</sup> ) | NC (mg kg <sup>-1</sup> ) | SAR   |
|-----------|---------|--------|---------------------------------|---------|-----------------------------|---------------------------|-------|
| W1F1      | 0.54    | 0.37   | -0.28                           | 0.33    | -0.62                       | 0.23                      | 0.61  |
| W1F2      | -0.24   | -0.32  | -0.85                           | -0.52   | -1.02                       | -0.28                     | -0.50 |
| W1F3      | -2.01   | -1.52  | -1.47                           | -1.53   | -1.37                       | -1.40                     | -0.19 |
| W2F1      | 1.21    | 0.72   | 0.85                            | 1.16    | 0.22                        | 0.75                      | 1.74  |
| W2F2      | -0.09   | 0.49   | 0.18                            | 0.24    | -0.09                       | -0.31                     | -1.17 |
| W2F3      | -0.66   | -1.01  | -0.85                           | -1.16   | -0.45                       | -1.13                     | -0.85 |
| W3F1      | 1.21    | 1.66   | 1.64                            | 1.46    | 1.74                        | 1.73                      | -0.65 |
| W3F2      | 0.38    | 0.46   | 0.92                            | 0.46    | 1.09                        | 0.87                      | -0.30 |
| W3F3      | -0.35   | -0.85  | -0.14                           | -0.43   | 0.50                        | -0.47                     | 1.31  |

Notes: TSS: total soluble solids, OA: organic acid, SSC: soluble sugar content, VC: vitamin C content, NC: nitrate concentration, SAR: sugar/acid content ratio.



Supplementary Table S8. The correlation matrix comes from the standardized values of tomato fruit quality.

| Item                            | TSS (%) | OA (%) | Lycopene (mg kg <sup>-1</sup> ) | SSC (%) | Vc (mg 100g <sup>-1</sup> ) | NC (mg kg <sup>-1</sup> ) | SAR  |
|---------------------------------|---------|--------|---------------------------------|---------|-----------------------------|---------------------------|------|
| TSS (%)                         | 1.00    | 0.92   | 0.86                            | 0.95    | 0.69                        | 0.91                      | 0.28 |
| TA (%)                          | 0.92    | 1.00   | 0.94                            | 0.98    | 0.76                        | 0.94                      | 0.01 |
| Lycopene (mg kg <sup>-1</sup> ) | 0.86    | 0.94   | 1.00                            | 0.94    | 0.92                        | 0.94                      | 0.13 |
| SSC (%)                         | 0.95    | 0.98   | 0.94                            | 1.00    | 0.75                        | 0.95                      | 0.22 |
| Vc (mg 100g <sup>-1</sup> )     | 0.69    | 0.76   | 0.92                            | 0.75    | 1.00                        | 0.81                      | 0.06 |
| NC (mg kg <sup>-1</sup> )       | 0.91    | 0.94   | 0.94                            | 0.95    | 0.81                        | 1.00                      | 0.15 |
| SAR                             | 0.28    | 0.01   | 0.13                            | 0.22    | 0.06                        | 0.15                      | 1.00 |

Notes: TSS: total soluble solids, OA: organic acid, SSC: soluble sugar content, VC: vitamin C content, NC: nitrate concentration, SAR: sugar/acid content ratio.

Supplementary Table S9. Total variance explained of the contribution rate and accumulative of contribution rate with eigenvalues was calculated by principal component analysis.

| Component | Initial Eigenvalues |               |              | Extraction Sums of Squared Loadings |               |              | Rotation Sums of Squared Loadings |               |              |
|-----------|---------------------|---------------|--------------|-------------------------------------|---------------|--------------|-----------------------------------|---------------|--------------|
|           | Total               | % of Variance | Cumulative % | Total                               | % of Variance | Cumulative % | Total                             | % of Variance | Cumulative % |
| 1         | 5.42                | 77.47         | 77.47        | 5.42                                | 77.47         | 77.47        | 5.36                              | 76.60         | 76.60        |
| 2         | 1.04                | 14.81         | 92.28        | 1.04                                | 14.81         | 92.28        | 1.10                              | 15.67         | 92.28        |
| 3         | 0.41                | 5.85          | 98.13        |                                     |               |              |                                   |               |              |
| 4         | 0.07                | 0.99          | 99.12        |                                     |               |              |                                   |               |              |
| 5         | 0.05                | 0.78          | 99.89        |                                     |               |              |                                   |               |              |
| 6         | 0.01                | 0.11          | 100.00       |                                     |               |              |                                   |               |              |
| 7         | 0.00                | 0.00          | 100.00       |                                     |               |              |                                   |               |              |

Extraction Method: Principal Component Analysis.

Supplementary Table S10. The two components are extracted matrix by principal component analysis of fruit quality.

| Item                            | Component |       |
|---------------------------------|-----------|-------|
|                                 | 1         | 2     |
| TSS (%)                         | 0.94      | 0.14  |
| OA (%)                          | 0.95      | -0.17 |
| Lycopene (mg kg <sup>-1</sup> ) | 0.98      | -0.06 |
| SSC (%)                         | 0.98      | 0.06  |
| Vc (mg 100g <sup>-1</sup> )     | 0.85      | -0.13 |
| NC (mg kg <sup>-1</sup> )       | 0.97      | -0.03 |
| SAR                             | 0.18      | 0.98  |

Notes: TSS: total soluble solids, OA: organic acid, SSC: soluble sugar content, VC: vitamin C content, NC: nitrate concentration, SAR: sugar/acid content ratio.

Supplementary Table S11. Mean vitamin C, soluble sugar content, total soluble solids, nitrate, lycopene, organic acid, sugar–acid ratio, yields, and WUE and PFP results from the different irrigation and fertilization levels on tomato fruit.

| Treatment | Yields<br>(kg ha <sup>-1</sup> ) | WUE<br>(kg m <sup>-3</sup> ) | PFP<br>(kg kg <sup>-1</sup> ) | TSS (%) | TA (%) | Lycopene<br>(mg kg <sup>-1</sup> ) | SSC (%) | VC<br>(mg 100g <sup>-1</sup> ) | NC<br>(mg kg <sup>-1</sup> ) | SAR   |
|-----------|----------------------------------|------------------------------|-------------------------------|---------|--------|------------------------------------|---------|--------------------------------|------------------------------|-------|
| W1F1      | 95825.29                         | 34.54                        | 187.89                        | 4.94    | 0.29   | 33.41                              | 3.03    | 25.07                          | 51.73                        | 10.74 |
| W1F2      | 89933.27                         | 32.20                        | 235.12                        | 4.86    | 0.27   | 27.20                              | 2.76    | 22.47                          | 47.43                        | 10.40 |
| W1F3      | 77980.70                         | 27.56                        | 305.81                        | 4.67    | 0.23   | 20.43                              | 2.43    | 20.16                          | 37.94                        | 10.49 |
| W2F1      | 85681.65                         | 37.04                        | 168.00                        | 5.01    | 0.31   | 45.68                              | 3.30    | 30.45                          | 56.11                        | 11.09 |
| W2F2      | 83002.27                         | 36.11                        | 217.00                        | 4.87    | 0.30   | 38.44                              | 3.01    | 28.48                          | 47.15                        | 10.19 |
| W2F3      | 76244.95                         | 33.21                        | 299.00                        | 4.81    | 0.25   | 27.14                              | 2.55    | 26.16                          | 40.27                        | 10.29 |
| W3F1      | 78044.01                         | 45.30                        | 153.03                        | 5.01    | 0.34   | 54.28                              | 3.40    | 40.31                          | 64.35                        | 10.35 |
| W3F2      | 75917.62                         | 44.91                        | 198.48                        | 4.92    | 0.30   | 46.43                              | 3.08    | 36.11                          | 57.08                        | 10.46 |
| W3F3      | 71207.72                         | 41.69                        | 279.25                        | 4.84    | 0.26   | 34.93                              | 2.79    | 32.28                          | 45.75                        | 10.96 |

Notes: TSS: total soluble solids, OA: organic acid, SSC: soluble sugar content, VC: vitamin C content, NC: nitrate concentration, SAR: sugar/acid content ratio.

Supplementary Table S12. The standardized values of yield, WUE, PFP and tomato fruit quality.

| Treatment | Yields<br>(kg ha <sup>-1</sup> ) | WUE (kg m <sup>-3</sup> ) | PFP<br>(kg kg <sup>-1</sup> ) | TSS (%) | TA (%) | Lycopene<br>(mg kg <sup>-1</sup> ) | SSC (%) | VC<br>(mg 100g <sup>-1</sup> ) | NC<br>(mg kg <sup>-1</sup> ) | SAR   |
|-----------|----------------------------------|---------------------------|-------------------------------|---------|--------|------------------------------------|---------|--------------------------------|------------------------------|-------|
| W1F1      | 1.83                             | -0.40                     | -0.69                         | 0.54    | 0.37   | -0.28                              | 0.33    | -0.62                          | 0.23                         | 0.61  |
| W1F2      | 1.08                             | -0.79                     | 0.14                          | -0.24   | -0.32  | -0.85                              | -0.52   | -1.02                          | -0.28                        | -0.50 |
| W1F3      | -0.46                            | -1.57                     | 1.39                          | -2.01   | -1.52  | -1.47                              | -1.53   | -1.37                          | -1.40                        | -0.19 |
| W2F1      | 0.53                             | 0.02                      | -1.04                         | 1.21    | 0.72   | 0.85                               | 1.16    | 0.22                           | 0.75                         | 1.74  |
| W2F2      | 0.19                             | -0.14                     | -0.18                         | -0.09   | 0.49   | 0.18                               | 0.24    | -0.09                          | -0.31                        | -1.17 |
| W2F3      | -0.68                            | -0.62                     | 1.27                          | -0.66   | -1.01  | -0.85                              | -1.16   | -0.45                          | -1.13                        | -0.85 |
| W3F1      | -0.45                            | 1.39                      | -1.31                         | 1.21    | 1.66   | 1.64                               | 1.46    | 1.74                           | 1.73                         | -0.65 |
| W3F2      | -0.72                            | 1.33                      | -0.51                         | 0.38    | 0.46   | 0.92                               | 0.46    | 1.09                           | 0.87                         | -0.30 |
| W3F3      | -1.33                            | 0.79                      | 0.92                          | -0.35   | -0.85  | -0.14                              | -0.43   | 0.50                           | -0.47                        | 1.31  |

Notes: WUE: water use efficiency, PFP: partial factor productivity, TSS: total soluble solids, OA: organic acid, SSC: soluble sugar content, VC: vitamin C content, NC: nitrate concentration, SAR: sugar/acid content ratio.

Supplementary Table S13. The correlation matrix comes from the standardized values of yield, WUE, PFP and tomato fruit quality.

| Item                            | Yields<br>(kg ha <sup>-1</sup> ) | WUE<br>(kg m <sup>-3</sup> ) | PFP<br>(kg kg <sup>-1</sup> ) | TSS<br>(%) | TA<br>(%) | Lycopene<br>(mg kg <sup>-1</sup> ) | SSC<br>(%) | Vc<br>(mg 100g <sup>-1</sup> ) | NC<br>(mg kg <sup>-1</sup> ) | SAR   |
|---------------------------------|----------------------------------|------------------------------|-------------------------------|------------|-----------|------------------------------------|------------|--------------------------------|------------------------------|-------|
| Yields (kg ha <sup>-1</sup> )   | 1.00                             | -0.39                        | -0.43                         | 0.29       | 0.28      | -0.11                              | 0.22       | -0.43                          | 0.14                         | 0.09  |
| WUE (kg m <sup>-3</sup> )       | -0.39                            | 1.00                         | -0.57                         | 0.69       | 0.66      | 0.88                               | 0.71       | 0.97                           | 0.78                         | 0.11  |
| PFP (kg kg <sup>-1</sup> )      | -0.43                            | -0.57                        | 1.00                          | -0.92      | -0.97     | -0.84                              | -0.96      | -0.60                          | -0.93                        | -0.16 |
| TSS (%)                         | 0.29                             | 0.69                         | -0.92                         | 1.00       | 0.91      | 0.87                               | 0.95       | 0.70                           | 0.91                         | 0.28  |
| TA (%)                          | 0.28                             | 0.66                         | -0.97                         | 0.91       | 1.00      | 0.90                               | 0.97       | 0.71                           | 0.94                         | -0.02 |
| Lycopene (mg kg <sup>-1</sup> ) | -0.11                            | 0.88                         | -0.84                         | 0.87       | 0.90      | 1.00                               | 0.94       | 0.92                           | 0.93                         | 0.13  |
| SSC (%)                         | 0.22                             | 0.71                         | -0.96                         | 0.95       | 0.97      | 0.94                               | 1.00       | 0.75                           | 0.95                         | 0.23  |
| Vc (mg 100g <sup>-1</sup> )     | -0.43                            | 0.97                         | -0.60                         | 0.70       | 0.71      | 0.92                               | 0.75       | 1.00                           | 0.81                         | 0.06  |
| NC (mg kg <sup>-1</sup> )       | 0.14                             | 0.78                         | -0.93                         | 0.91       | 0.94      | 0.93                               | 0.95       | 0.81                           | 1.00                         | 0.15  |
| SAR                             | 0.09                             | 0.11                         | -0.16                         | 0.28       | -0.02     | 0.13                               | 0.23       | 0.06                           | 0.15                         | 1.00  |

Notes: WUE: water use efficiency, PFP: partial factor productivity, TSS: total soluble solids, OA: organic acid, SSC: soluble sugar content, VC: vitamin C content, NC: nitrate concentration, SAR: sugar/acid content ratio.

Supplementary Table S14. Total variance explained of the contribution rate and accumulative of contribution rate with eigenvalues was calculated by principal component analysis.

| Component | Initial Eigenvalues |               |              | Extraction Sums of Squared Loadings |               |              | Rotation Sums of Squared Loadings |               |              |
|-----------|---------------------|---------------|--------------|-------------------------------------|---------------|--------------|-----------------------------------|---------------|--------------|
|           | Total               | % of Variance | Cumulative % | Total                               | % of Variance | Cumulative % | Total                             | % of Variance | Cumulative % |
| 1         | 6.96                | 69.61         | 69.61        | 6.96                                | 69.61         | 69.61        | 6.75                              | 67.53         | 67.53        |
| 2         | 1.79                | 17.85         | 87.47        | 1.79                                | 17.85         | 87.47        | 1.93                              | 19.27         | 86.80        |
| 3         | 1.02                | 10.17         | 97.63        | 1.02                                | 10.17         | 97.63        | 1.08                              | 10.83         | 97.63        |
| 4         | 0.12                | 1.17          | 98.81        |                                     |               |              |                                   |               |              |
| 5         | 0.08                | 0.76          | 99.56        |                                     |               |              |                                   |               |              |
| 6         | 0.03                | 0.34          | 99.90        |                                     |               |              |                                   |               |              |
| 7         | 0.01                | 0.08          | 99.98        |                                     |               |              |                                   |               |              |
| 8         | 0.00                | 0.02          | 100.00       |                                     |               |              |                                   |               |              |
| 9         | 0.00                | 0.00          | 100.00       |                                     |               |              |                                   |               |              |
| 10        | (0.00)              | (0.00)        | 100.00       |                                     |               |              |                                   |               |              |

Extraction Method: Principal Component Analysis.

Supplementary Table S15. The three components extracted matrix by principal component analysis of yield, WUE, PFP and tomato fruit quality.

| Item                            | Component |       |       |
|---------------------------------|-----------|-------|-------|
|                                 | 1         | 2     | 3     |
| Yields (kg ha <sup>-1</sup> )   | 0.09      | 0.98  | -0.09 |
| WUE (kg m <sup>-3</sup> )       | 0.83      | -0.50 | 0.06  |
| PFP (kg kg <sup>-1</sup> )      | -0.92     | -0.36 | 0.07  |
| TSS (%)                         | 0.94      | 0.22  | 0.09  |
| OA (%)                          | 0.95      | 0.19  | -0.22 |
| Lycopene (mg kg <sup>-1</sup> ) | 0.97      | -0.19 | -0.01 |
| SSC (%)                         | 0.98      | 0.16  | 0.03  |
| Vc (mg 100g <sup>-1</sup> )     | 0.85      | -0.52 | 0.00  |
| NC (mg kg <sup>-1</sup> )       | 0.98      | 0.05  | -0.03 |
| SAR                             | 0.17      | 0.17  | 0.97  |

Notes: WUE: water use efficiency, PFP: partial factor productivity, TSS: total soluble solids, OA: organic acid, SSC: soluble sugar content, VC: vitamin C content, NC: nitrate concentration, SAR: sugar/acid content ratio.



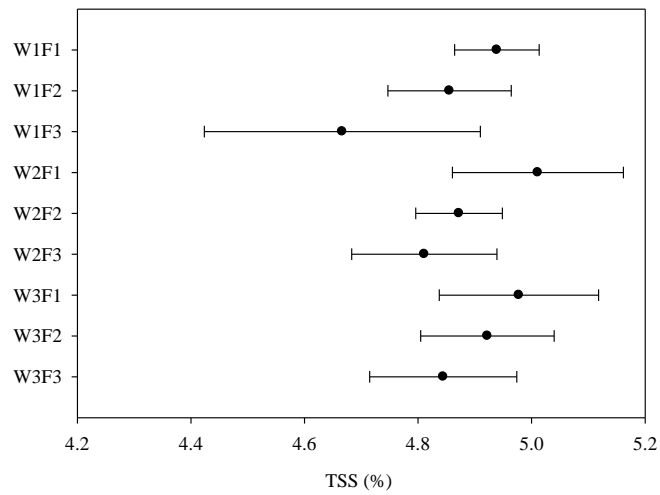

Supplementary Figure S1. The effect of irrigation and fertilization on total soluble solids (TSS) at different water and fertilizer input levels. Data are means of nine replicates, which was composed of three consecutive growing seasons and three replications per treatments and displayed as low and high (from top to the bottom).

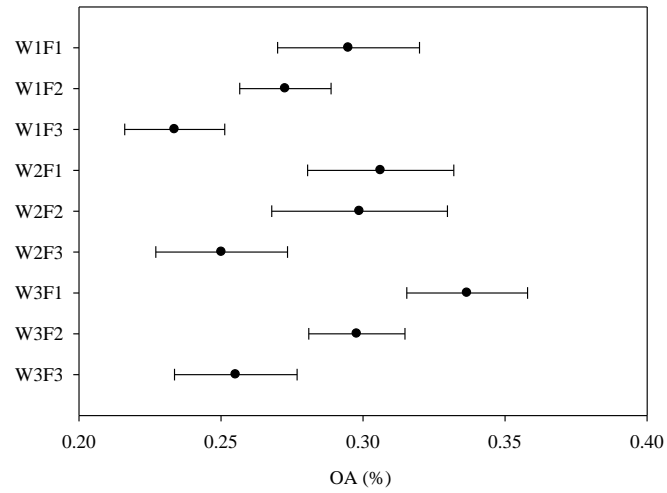

Supplementary Figure S2. The effect of irrigation and fertilization on organic acid (OA) at different water and fertilizer input levels. Data are means of nine replicates, which was composed of three consecutive growing seasons and three replications per treatments and displayed as low and high (from top to the bottom).

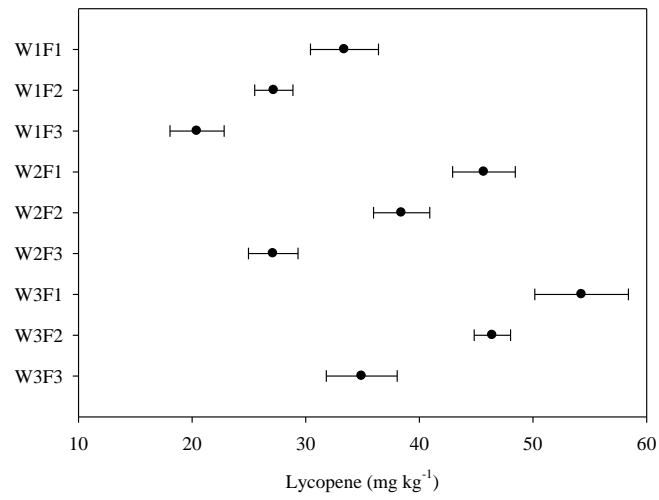

Supplementary Figure S3. The effect of irrigation and fertilization on lycopene at different water and fertilizer input levels. Data are means of nine replicates, which was composed of three consecutive growing seasons and three replications per treatments and displayed as low and high (from top to the bottom).

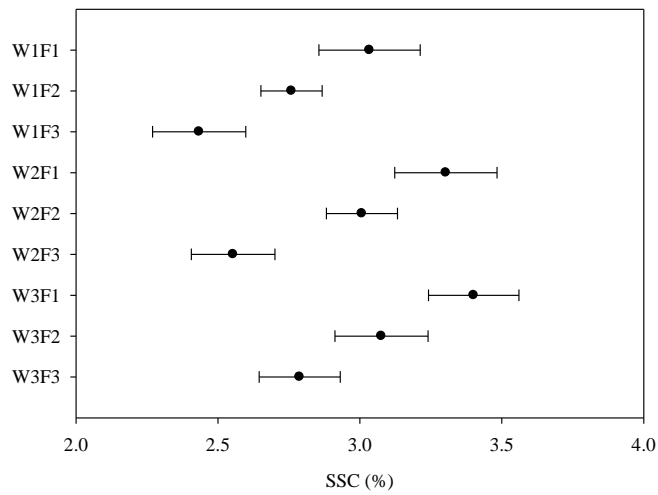

Supplementary Figure S4. The effect of irrigation and fertilization on soluble sugar content (SSC) at different water and fertilizer input levels. Data are means of nine replicates, which was composed of three consecutive growing seasons and three replications per treatments and displayed as low and high (from top to the bottom).

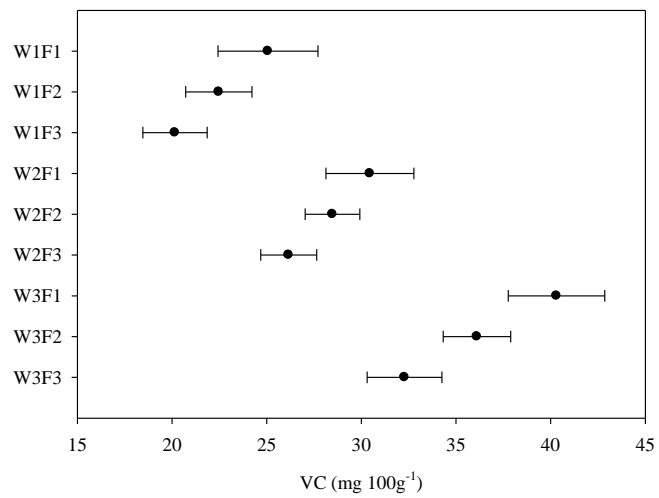

Supplementary Figure S5. The effect of irrigation and fertilization on vitamin C (VC) at different water and fertilizer input levels. Data are means of nine replicates, which was composed of three consecutive growing seasons and three replications per treatments and displayed as low and high (from top to the bottom).

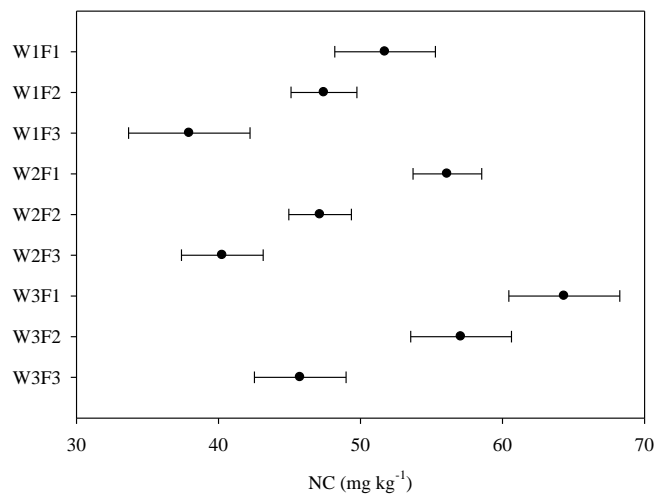

Supplementary Figure S6. The effect of irrigation and fertilization on nitrate concentration (NC) at different water and fertilizer input levels. Data are means of nine replicates, which was composed of three consecutive growing seasons and three replications per treatments and displayed as low and high (from top to the bottom).

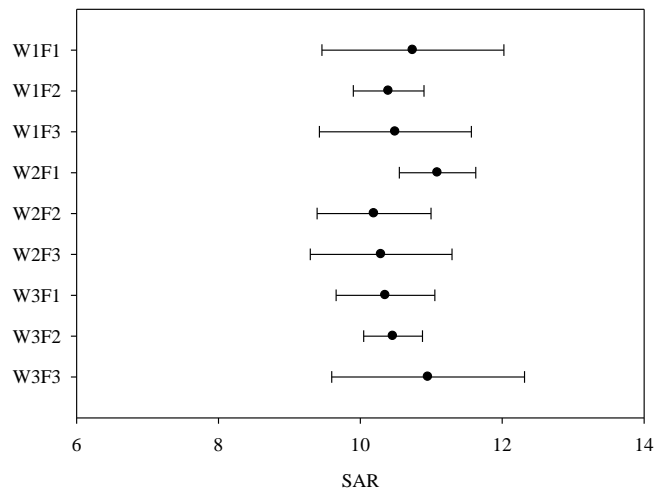

Supplementary Figure S7. The effect of irrigation and fertilization on sugar/acid content ratio (SAR) at different water and fertilizer input levels. Data are means of nine replicates, which was composed of three consecutive growing seasons and three replications per treatments and displayed as low and high (from top to the bottom).

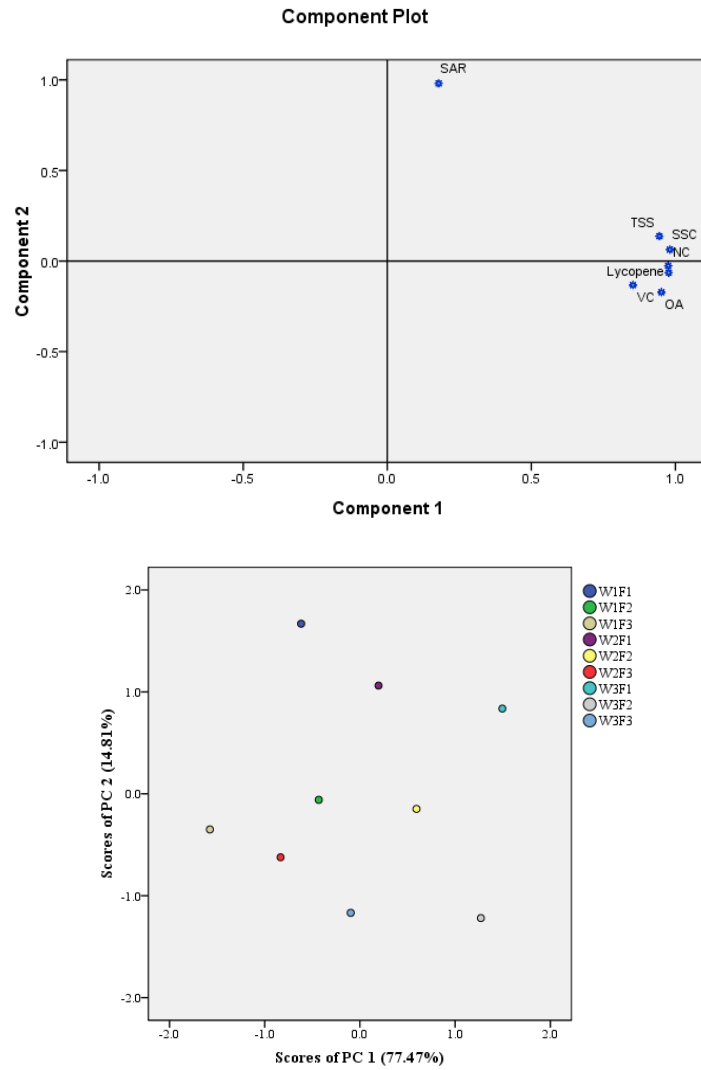

Supplementary Figure S8. Principal components analysis (PCA) plots and Score plot of a two component PCA model of fruit quality. Notes: TSS: total soluble solids, OA: organic acid, SSC: soluble sugar content, VC: vitamin C content, NC: nitrate concentration, SAR: sugar/acid content ratio.



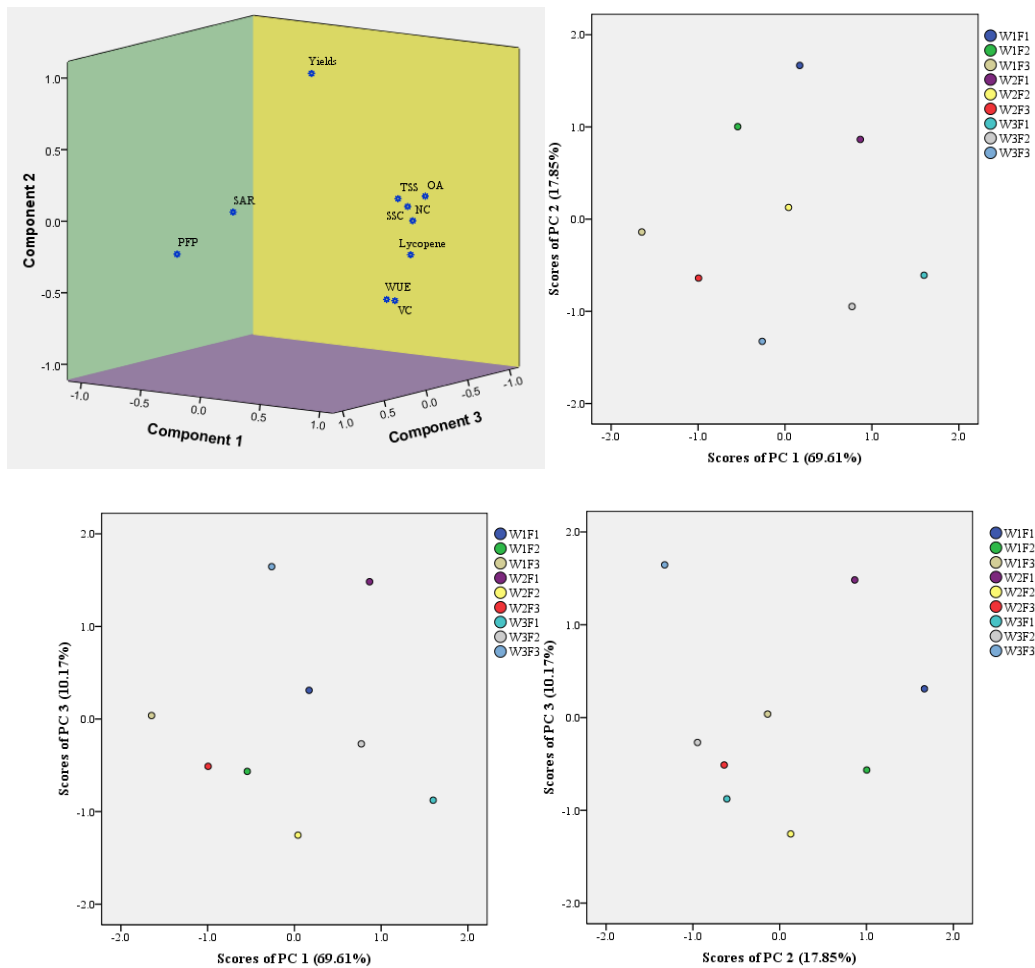

Supplementary Figure S9. Principal components analysis (PCA) plots and score plot of a three component PCA model of yield, WUE, PFP and tomato fruit quality. Notes: WUE: water use efficiency, PFP: partial factor productivity, TSS: total soluble solids, OA: organic acid, SSC: soluble sugar content, VC: vitamin C content, NC: nitrate concentration, SAR: sugar/acid content ratio.
